## Impact of initial rhythm control with cryoballoon ablation versus drug therapy on atrial fibrillation recurrence and quality of life: results from the Cryo-FIRST study

Pavlovic N.<sup>1</sup>; Kuniss M.<sup>2</sup>; Velagic V.<sup>3</sup>; Hermida JS.<sup>4</sup>; Healey S.<sup>5</sup>; Arena G.<sup>6</sup>; Badenco N.<sup>7</sup>; Meyer C.<sup>8</sup>; Chen J.<sup>9</sup>; Iacopino S.<sup>10</sup>; Anselme F.<sup>11</sup>; Kaplon RE.<sup>12</sup>; Chierchia GB.<sup>13</sup>

<sup>1</sup>University Hospital Sestre Milosrdnice, Zagreb, Croatia

<sup>2</sup>Kerckhoff Heart and Thorax Center, Bad Nauheim, Germany

<sup>3</sup>University Hospital Centre Zagreb, Zagreb, Croatia

<sup>4</sup>University Hospital of Amiens, Amiens, France

<sup>5</sup>Monash Health, Clayton, Australia

<sup>6</sup>Ospedale Apuane, Massa Carrara, Italy

<sup>7</sup>Sorbonne University, Paris, France

<sup>8</sup>University Heart Centre Hamburg, Hamburg, Germany

<sup>9</sup>Haukeland University Hospital, Bergen, Norway

<sup>10</sup>Maria Cecilia Hospital, Cotignola, Italy

<sup>11</sup>CHU de Rouen, Rouen, France

<sup>12</sup>Medtronic, Mounds View, United States of America

<sup>13</sup>UZ Brussel, Jette, Belgium

**Funding Acknowledgements:** Type of funding sources: Private company. Main funding source(s): Medtronic

**OnBehalf:** The Cryo-FIRST Investigators

**Background:** Cryoballoon ablation (CBA) as a first-line rhythm control strategy is superior to antiarrhythmic drugs (AADs) for preventing atrial arrhythmia recurrence; however, the impact of first-line CBA specifically on atrial fibrillation (AF) recurrence and quality of life (QoL) has not been well characterized.

**Purpose:** To compare AF recurrence and QoL following first-line CBA vs. AAD therapy in patients with paroxysmal AF within the CryoFIRST trial (NCT01803438).

**Methods:** Patients with recurrent symptomatic paroxysmal AF who had not been administered class I or III AAD therapy for >48 hours were enrolled at 18 sites in 9 countries. Patients were randomized (1:1) to CBA or AAD treatment (Class I or III). Subjects were followed by 7-day Holter at 1, 3, 6, 9, and 12 months. Time-to-first AF recurrence outside of a 90-day blanking period was estimated by Kaplan-Meier analysis. QoL was evaluated using the Atrial Fibrillation Effect on Quality of Life (AFEQT) and 36-Item Short Form Health Survey (SF-36) v2 questionnaires.

**Results:** Of the 218 randomized subjects, 187 (86%) completed the 12-month follow-up. By intention-to-treat (ITT) analysis, freedom from AF after blanking was achieved in 86.6% in the CBA and 74.5% in the AAD group ( $p = 0.023$ ). There was no difference in the time-to-first serious adverse event between groups. In total, 84.3% of patients in the CBA vs. 75.0% of patients in the AAD arm had a clinically important improvement ( $\geq 5$  points) in the AFEQT summary score. The adjusted mean difference in the AFEQT summary score at 12 months was 9.9 points higher in the CBA group (95% CI: 5.5-14.2;  $P < 0.001$ ). All AFEQT subscale scores were more favorable in the CBA vs. AAD group at 12 months. There were no significant group differences in any of the SF-36 health domain scores at 12 months in the ITT analysis. In the per-protocol analysis, clinically important and significant group differences in favor of CBA were observed at 12 months for 3 of 8 SF-36 health domain scores (physical functioning, general health and social functioning).

**Conclusion:** CBA is superior to AAD for preventing AF recurrence and improving AF-specific QoL in patients with paroxysmal AF.

AFEQT Scores at Baseline and 12 Months

| AFEQT Score, Mean $\pm$ Standard Deviation | CBA             |                 | AAD             |                 | Adjusted Mean Difference at 12 Months (CBA vs. AAD) | p-value |
|--------------------------------------------|-----------------|-----------------|-----------------|-----------------|-----------------------------------------------------|---------|
|                                            | 12 Months       | Baseline        | 12 Months       | Baseline        |                                                     |         |
| Baseline                                   |                 |                 |                 |                 |                                                     |         |
| Daily Activities                           | 65.3 $\pm$ 25.8 | 87.8 $\pm$ 17.1 | 61.0 $\pm$ 27.9 | 76.6 $\pm$ 25.4 | 8.9 (3.2-14.6)                                      | 0.002   |
| Symptoms                                   | 59.9 $\pm$ 24.8 | 88.8 $\pm$ 15.6 | 58.4 $\pm$ 25.2 | 80.9 $\pm$ 22.2 | 7.1 (1.5-12.7)                                      | 0.014   |
| Treatment Concern                          | 59.9 $\pm$ 23.1 | 89.8 $\pm$ 14.0 | 60.4 $\pm$ 24.5 | 77.7 $\pm$ 22.2 | 12.7 (7.9-17.5)                                     | <0.001  |

AFEQT, Atrial Fibrillation Effect on Quality of Life questionnaire. CBA, cryoballoon ablation. AAD antiarrhythmic drug. Abstract Figure. Freedom From Atrial Fibrillation

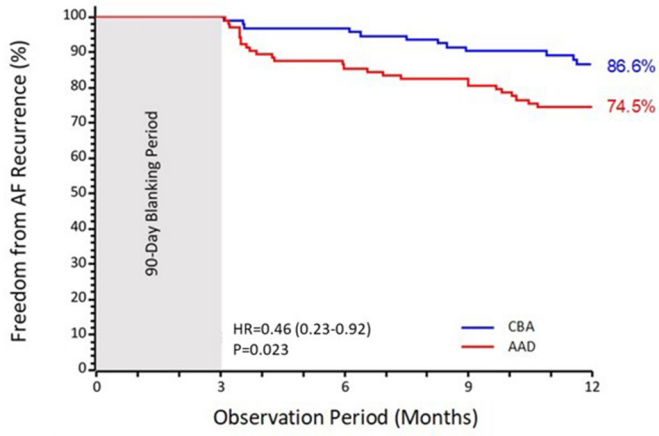

| No. at Risk   | 0   | 3   | 6  | 9  | 12 |
|---------------|-----|-----|----|----|----|
| Cryo-ablation | 107 | 94  | 90 | 83 | 56 |
| Drug therapy  | 111 | 104 | 88 | 81 | 43 |
